# Supplementary material for: Role of uL3 in the Crosstalk between Nucleolar Stress and Autophagy in Colon Cancer Cells
Source: MDPI journal article supplement (doi:10.3390/ijms21062143), 2020-03-20
Supplement: s1 [file s1]

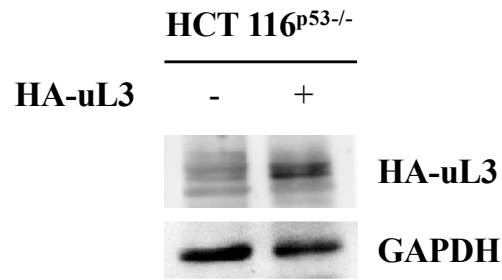

**Figure S1.** Transfection efficiency of pHA-uL3 evaluated by western blotting. HCT 116<sup>p53-/-</sup> cells were transiently transfected with 1 µg of pHA-uL3. 24 h later, cells were lysated and protein extracts from the samples were analyzed by western blotting with antibodies against uL3 and GAPDH as loading control. Full-length blots are presented in Figure S9.

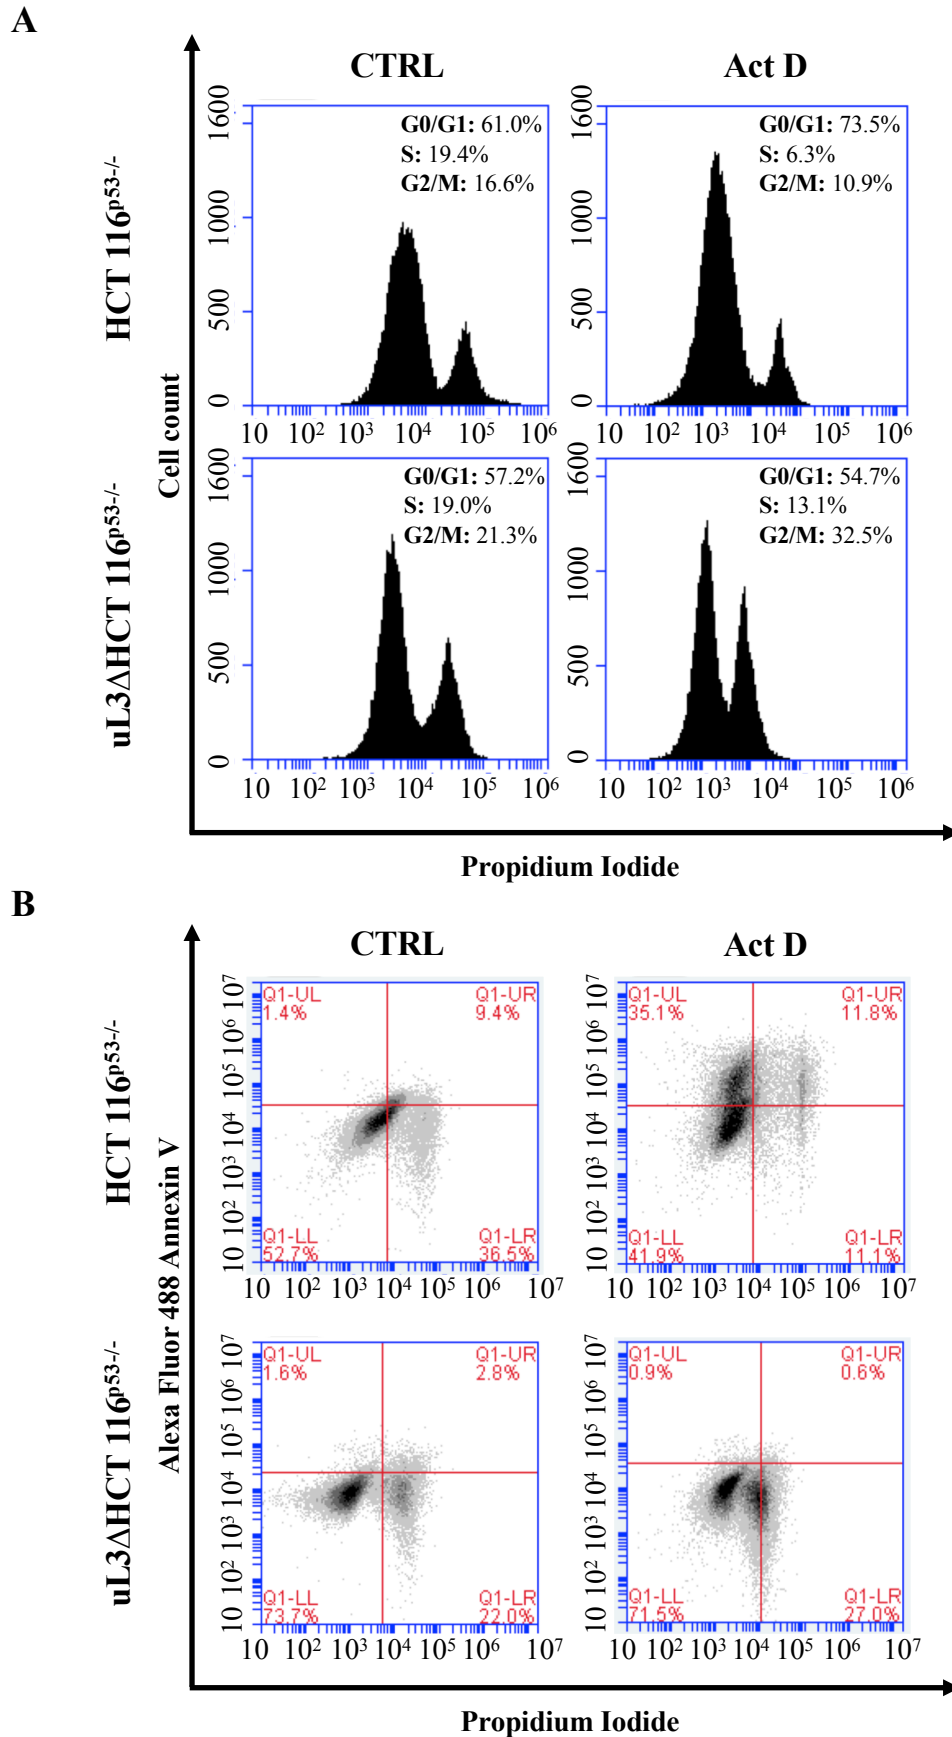

**Figure S2.** Effect of Act D treatment on cell cycle and apoptosis in uL3ΔHCT 116<sup>p53-/-</sup> cells. **(A)** HCT 116<sup>p53-/-</sup> and uL3ΔHCT 116<sup>p53-/-</sup> cells were treated with 5 nM Act D. 24 h later, cells were stained with PI and analysed using FACS. Peaks representing histograms of cell numbers and percentages in G1, S, and G2/M phases are shown. **(B)** Representative flow cytometry dot blots with double Annexin V-Alexa Fluor 488/PI staining for HCT 116<sup>p53-/-</sup> and uL3ΔHCT 116<sup>p53-/-</sup> treated with 5 nM Act D for 24 h.

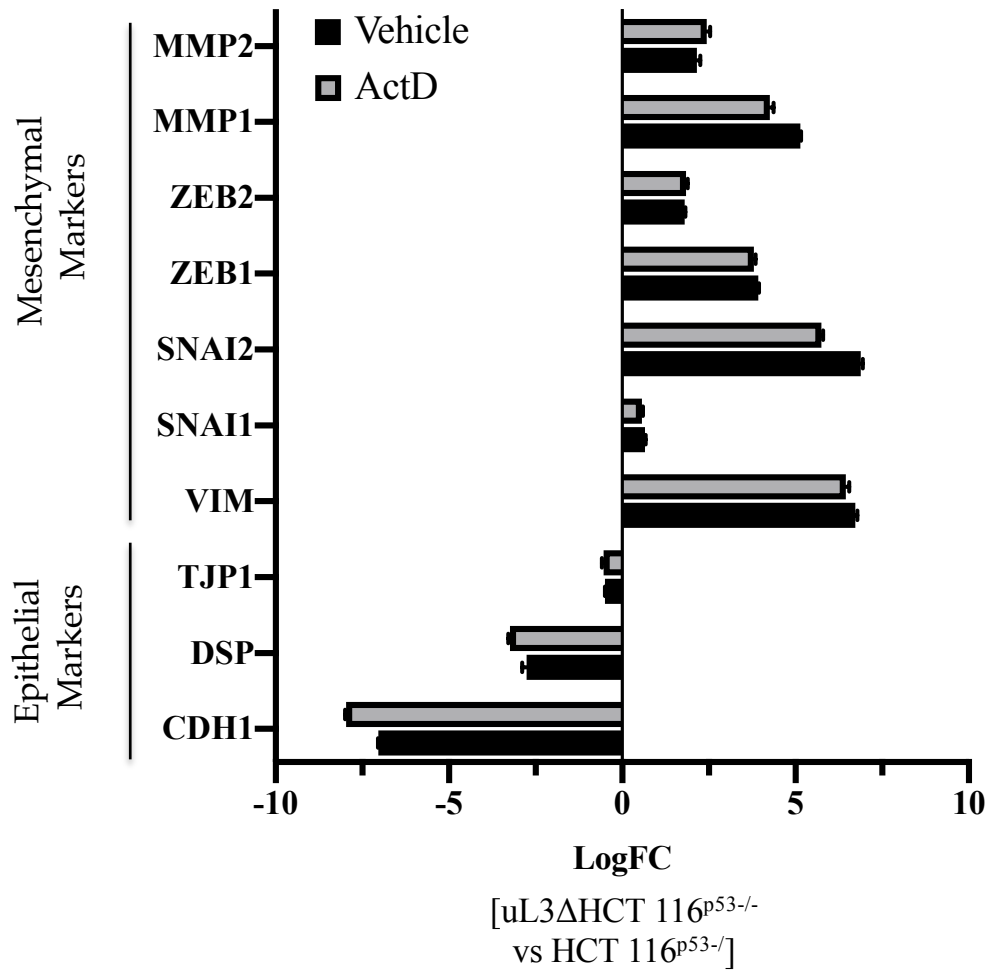

**Figure S3.** Epithelial-mesenchymal transition (EMT) related differential expressed genes between uL3ΔHCT 116<sup>p53-/-</sup> and HCT 116<sup>p53-/-</sup> cells treated or not with 5nM Act D for 24 h by RNA-seq analysis. Mesenchymal markers: MMP2, MMP1, ZEB2, ZEB1, SNAI2, SNAI1, VIM; epithelial markers: TJP1, DSP, CDH1; x-axis represents log 2 fold change of expressed genes vs average expression normalized to log 2 scale for each genes.

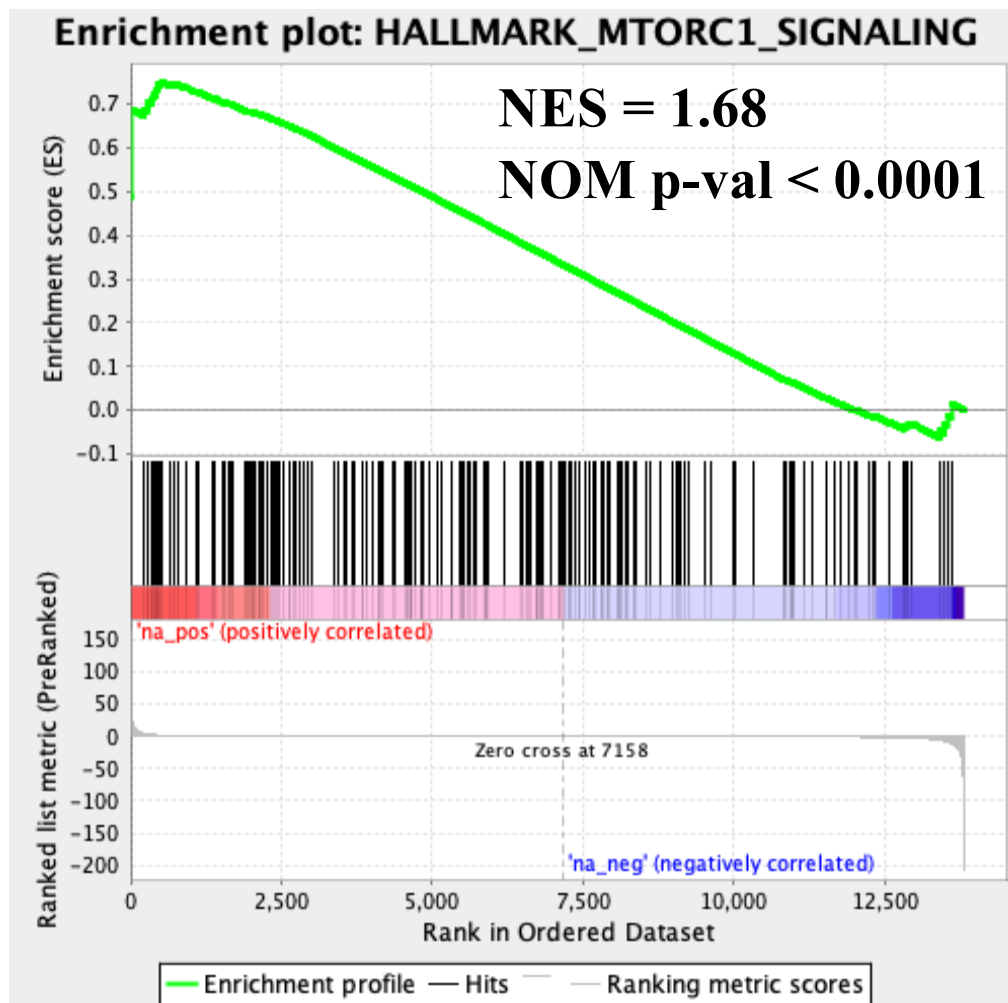

**Figure S4.** mTORC pathway regulated by Act D treatment in HCT 116<sup>p53-/-</sup> cells. The GSEA (Gene Set Enrichment Analysis) plots showing MTORC1\_SIGNALING hallmark gene set in HCT 116<sup>p53-/-</sup> cells treated with Act D. The normalized enrichment scores (NES) and p value were indicated.

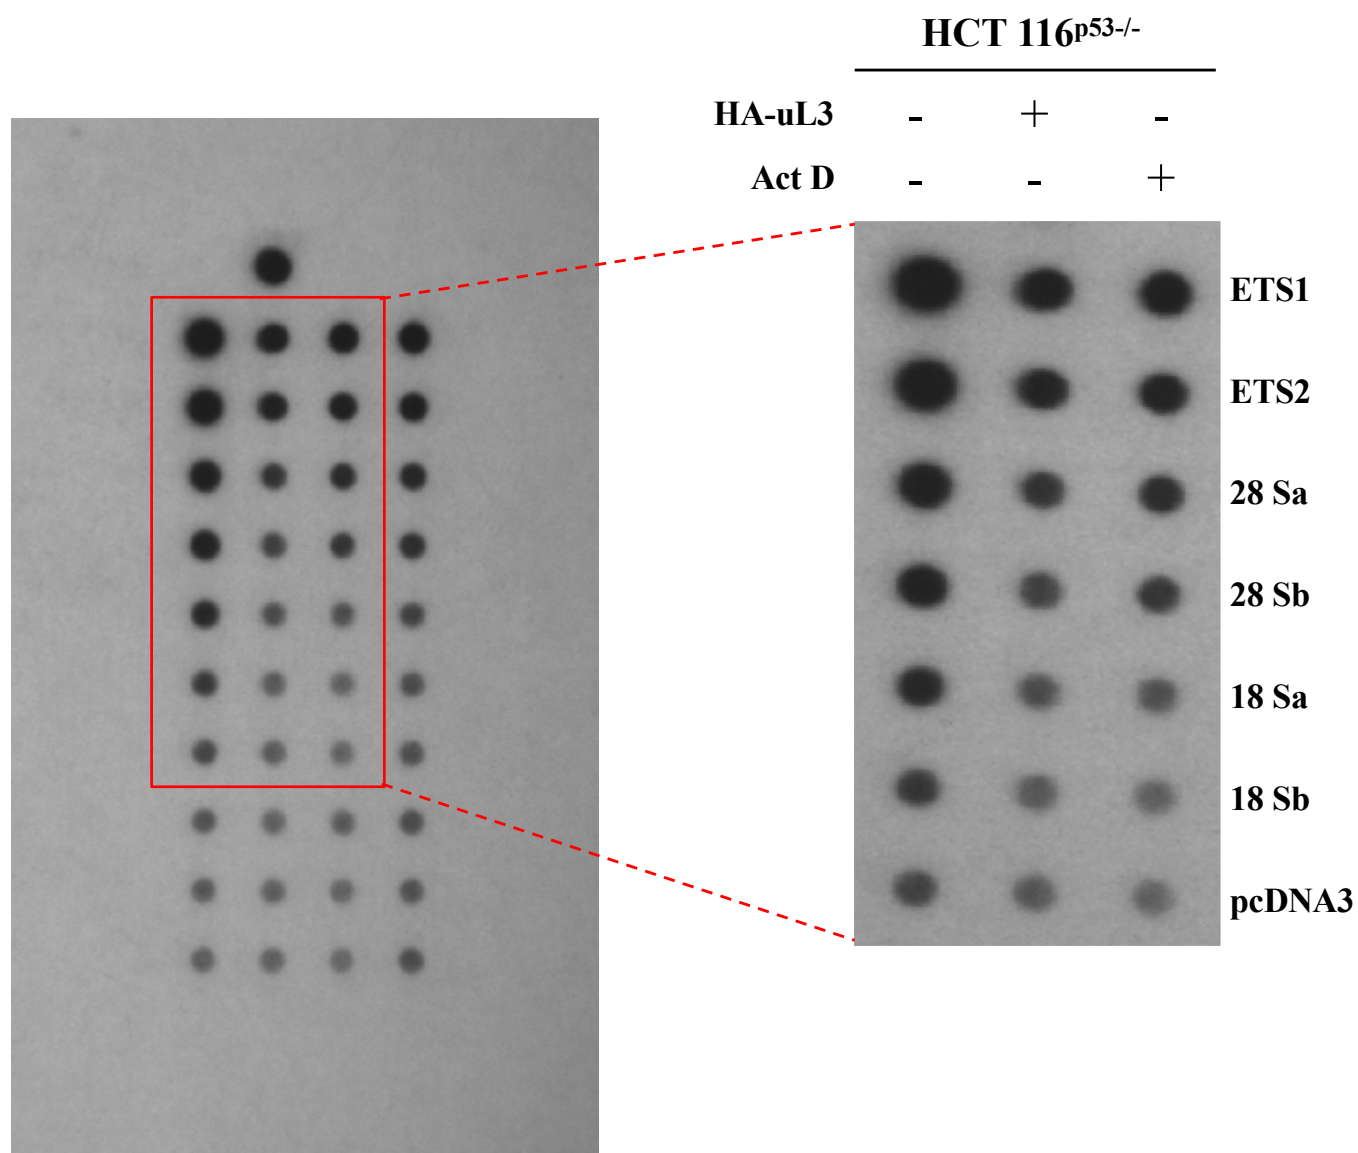

**Figure S5.** Full length blot of Figure 2B.

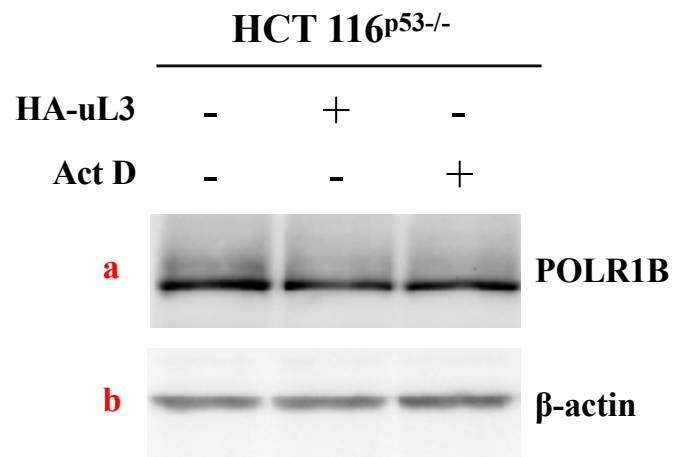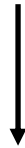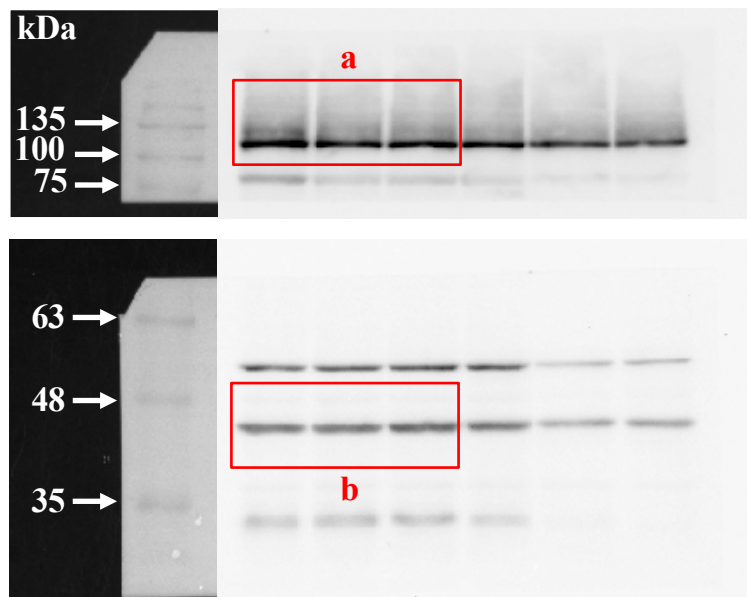

**Figure S6.** Full length blots of Figure 2C.

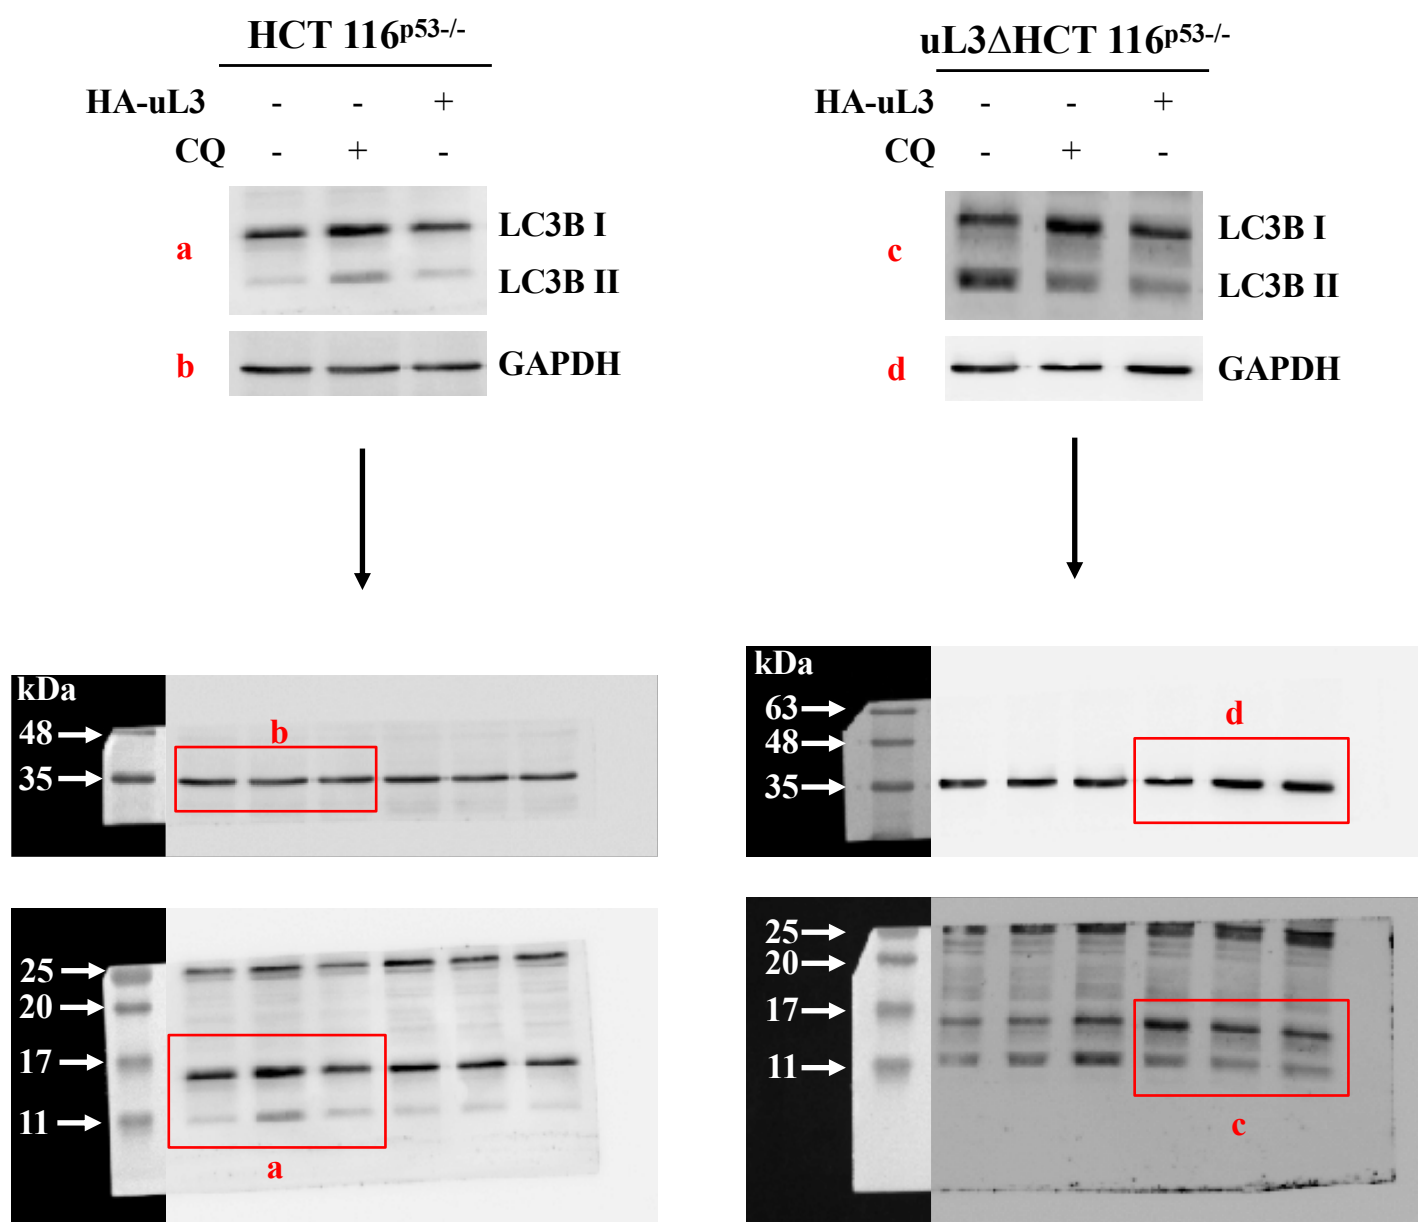

**Figure S7.** Full length blots of Figures 6A and 6B.

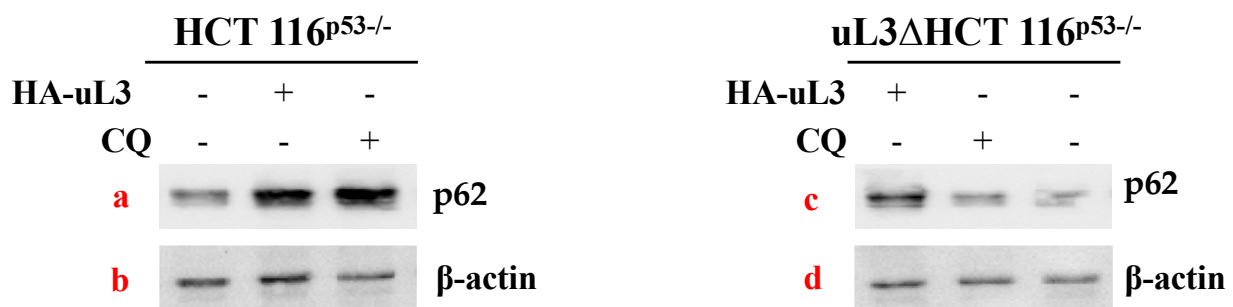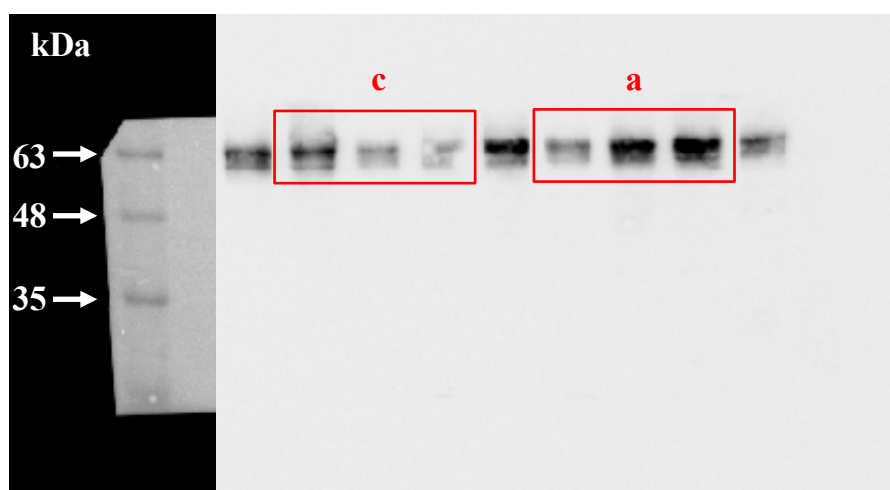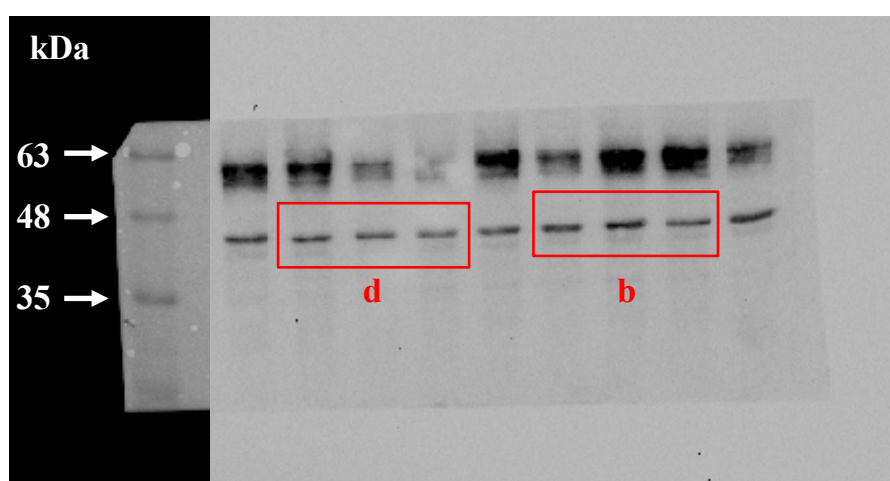

**Figure S8.** Full length blots of Figures 6C and 6D .



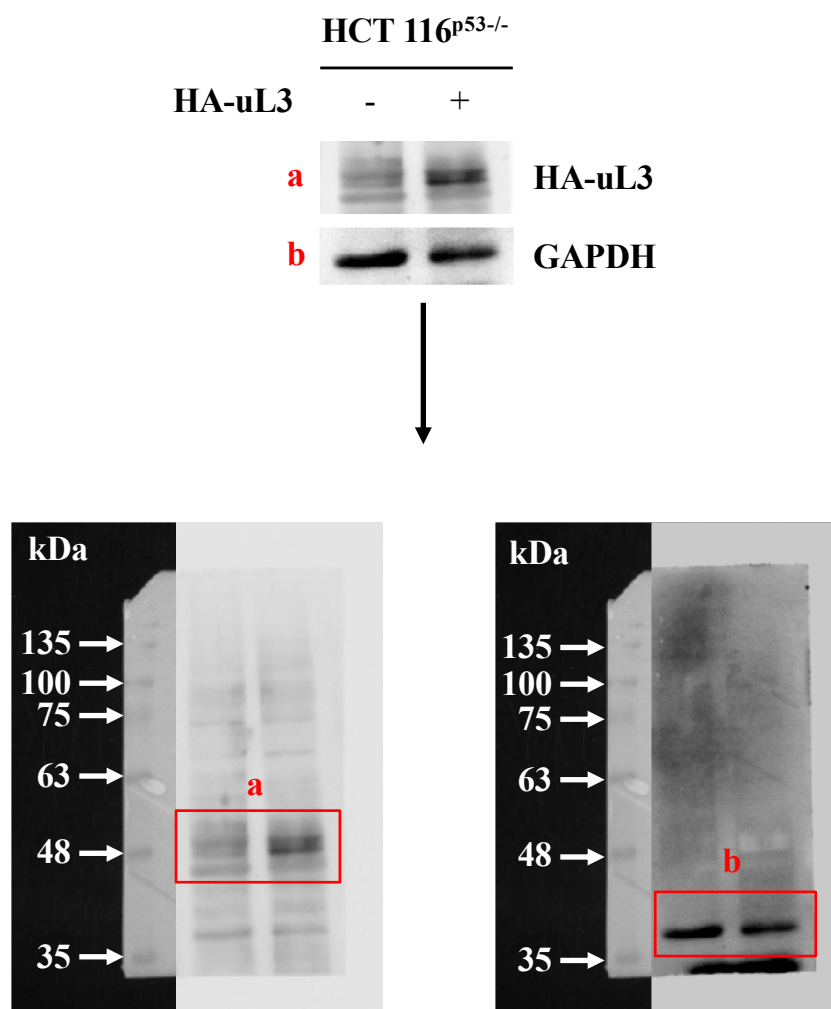

**Figure S9.** Full length blots of Figure S1.
